# Supplementary material
Source: PubMed Central journal article supplement (PMC5566049)
Supplement: 2016_157669-Disclosures_and_Contributions.pdf [file 2016_157669-Disclosures_and_Contributions.pdf]

Haematologica  
HAEMATOL/2016/157669  
Version 3

Role of miR-15a/miR-16-1 and TP53 axis in regulating telomerase  
expression in chronic lymphocytic leukemia

Enrica Rampazzo, Engin Bojnik, Livio Trentin, Laura Bonaldi, Paola Del  
Bianco, Federica Frezzato, Andrea Visentin, Monica Facco, Gianpietro  
Semenzato, and Anita De Rossi

Disclosures: The authors declare no conflict of interest

Contributions: Contributions: ER, EB, ADR designed the research; ER, EB performed research on TERT, TP53 and miRNA; MF performed molecular analyses on CLL; AV, LT, GS followed the patients and provided samples and clinical data; PDB performed the statistical analyses; ER, EB, ADR analyzed the data; ADR supervised the study and wrote the paper with the contribution of all co-authors. LT, GS, and ADR reviewed the manuscript.
